# Supplementary material for: The microstrain-accompanied structural phase transition from h-MoO3 to α-MoO3 investigated by in situ X-ray diffraction
Source: publisher site journal article supplement (doi:10.3762/bjnano.14.55), 2023-06-07
Supplement: Additional file 1 [file 2190-4286-14-55-S1.pdf]

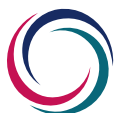

## Supporting Information

for

### **The microstrain-accompanied structural phase transition from h-MoO<sub>3</sub> to α-MoO<sub>3</sub> investigated by in situ X-ray diffraction**

Zeqian Zhang, Honglong Shi, Boxiang Zhuang, Minting Luo and Zhenfei Hu

*Beilstein J. Nanotechnol.* **2023**, *14*, 692–700. [doi:10.3762/bjnano.14.55](https://doi.org/10.3762/bjnano.14.55)

### **Photocatalysis performance of the MoO<sub>3</sub> samples**

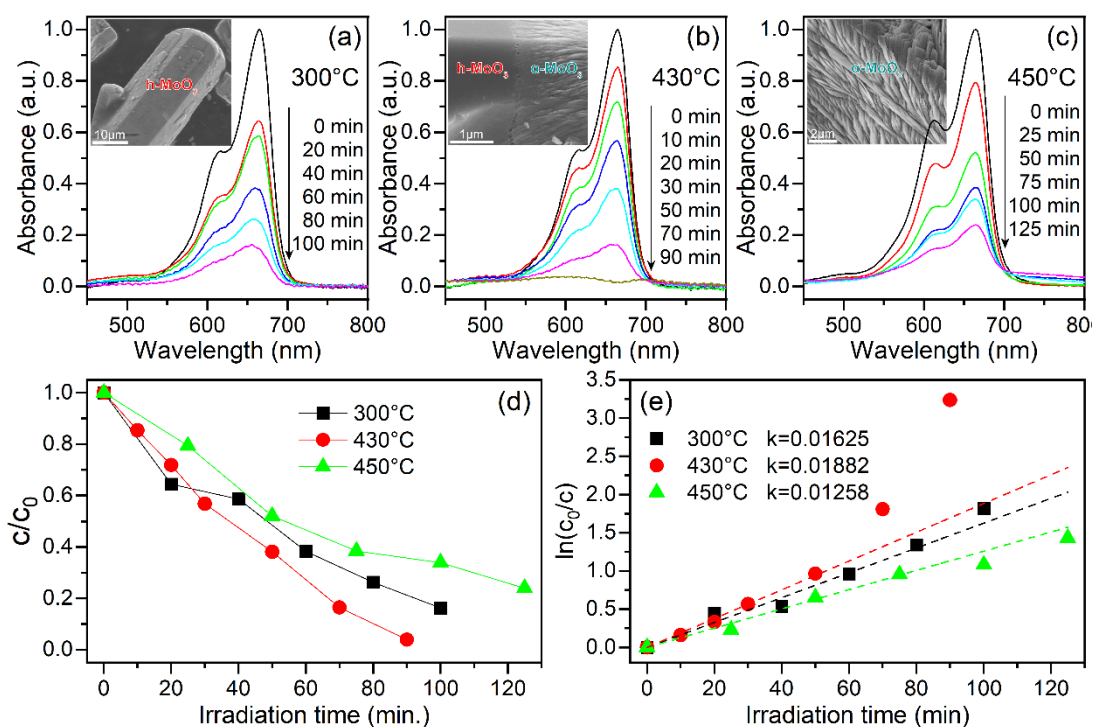

**Figure S1:** Photocatalysis performance of the MoO<sub>3</sub> samples. (a–c) UV–vis absorption spectra of methylene blue mixed with samples calcinated at 300, 430, and 450 °C. The insets display SEM micrographs of the samples. (d) Photodegradation  $c/c_0$ , and (e)  $\ln(c_0/c)$  as a function of the irradiation time. The dotted lines are linear fits.
